# Supplementary material for: Effects of a Nudging Cue Targeting Food Choice in a University Cafeteria: A Field Study
Source: MDPI journal article supplement (doi:10.3390/healthcare11091307), 2023-05-03

Layout of the cafeteria and placement of the nudges: Ground floor

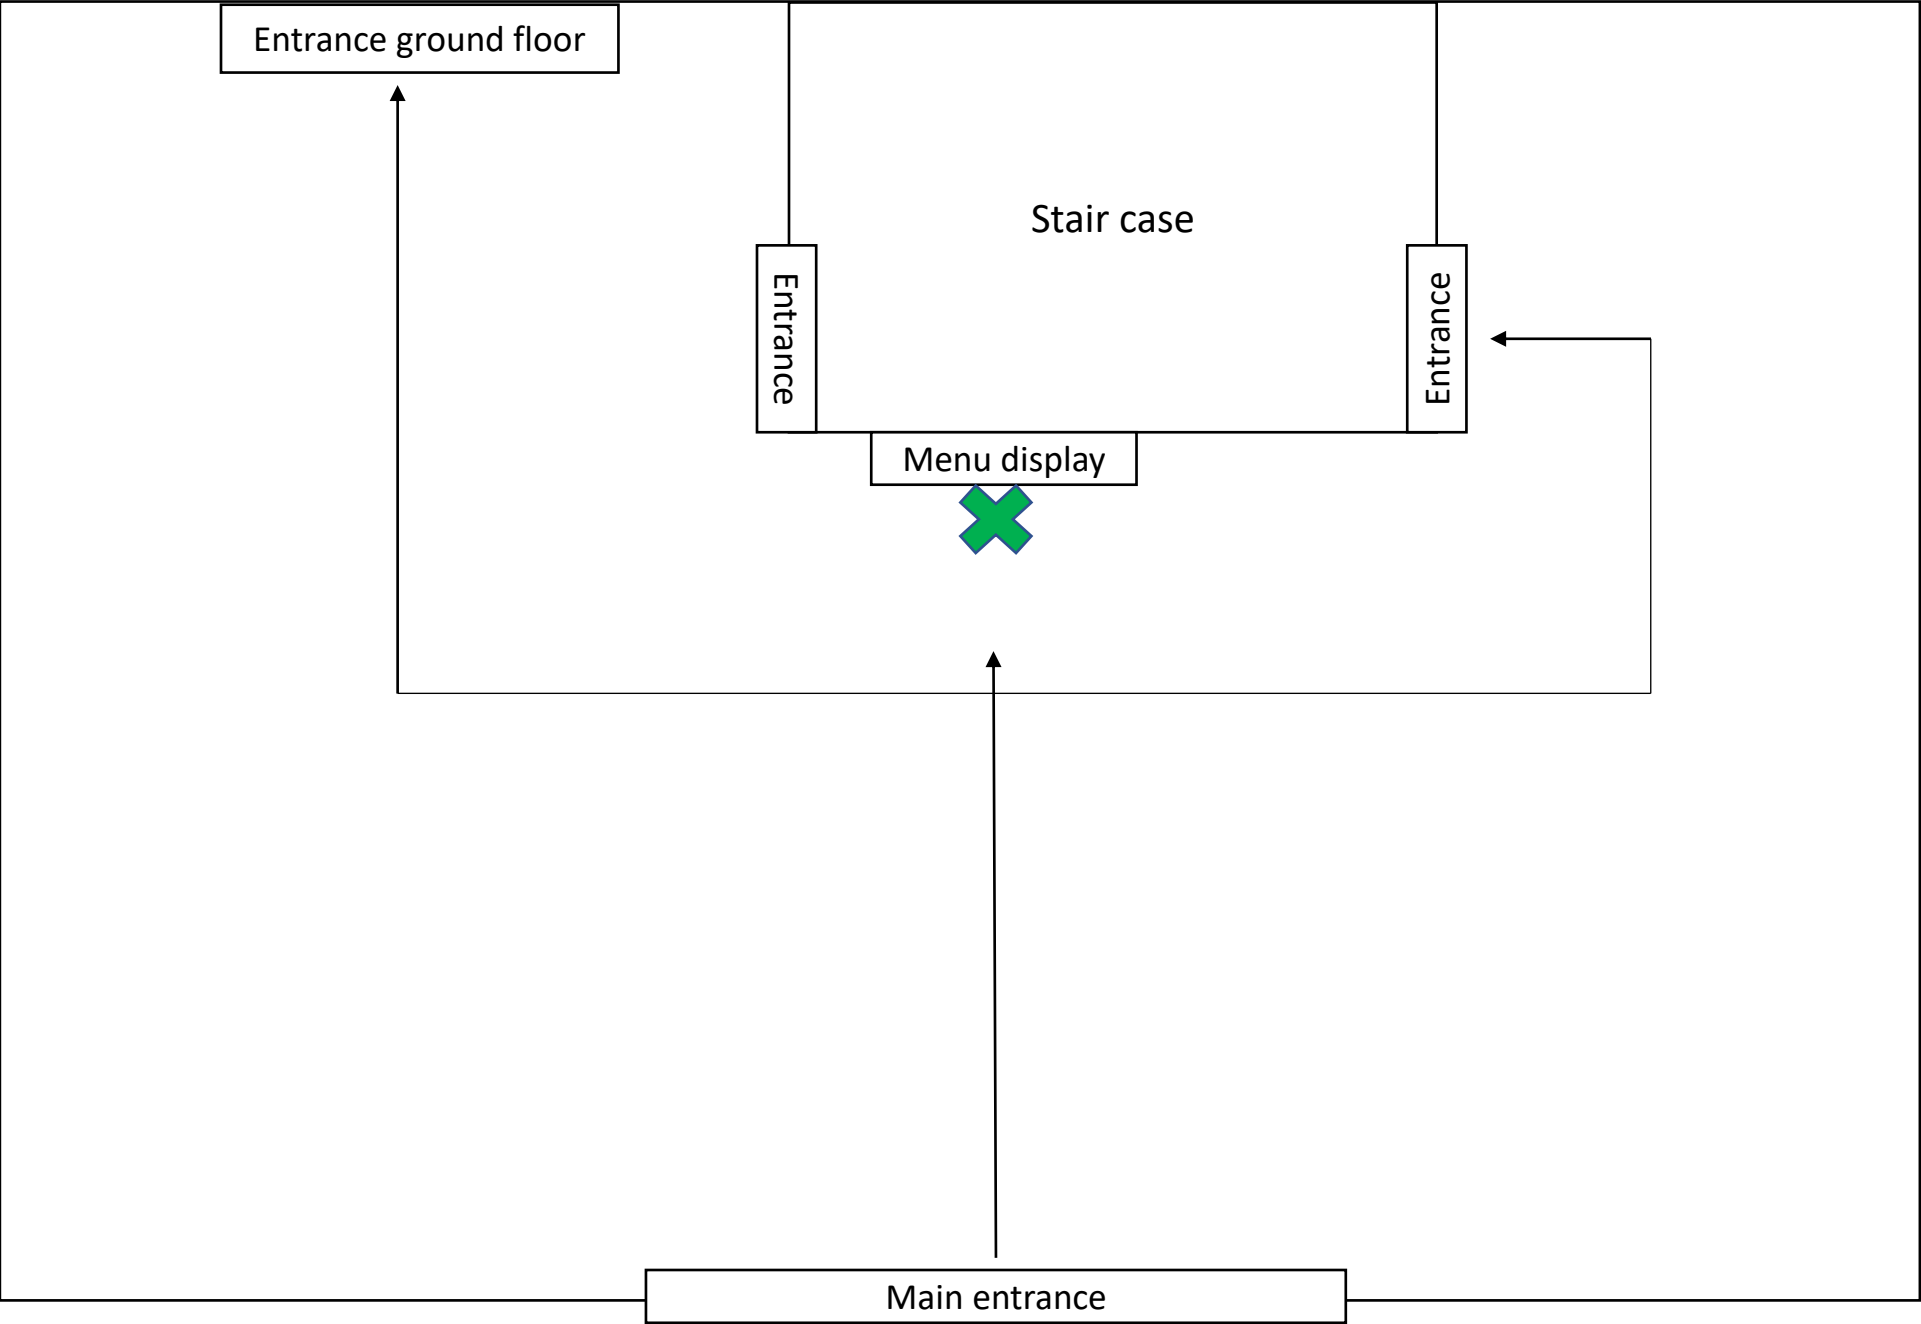

 = *Piazza*, DIN A0 poster

Layout of the cafeteria and placement of the nudges: Ground floor

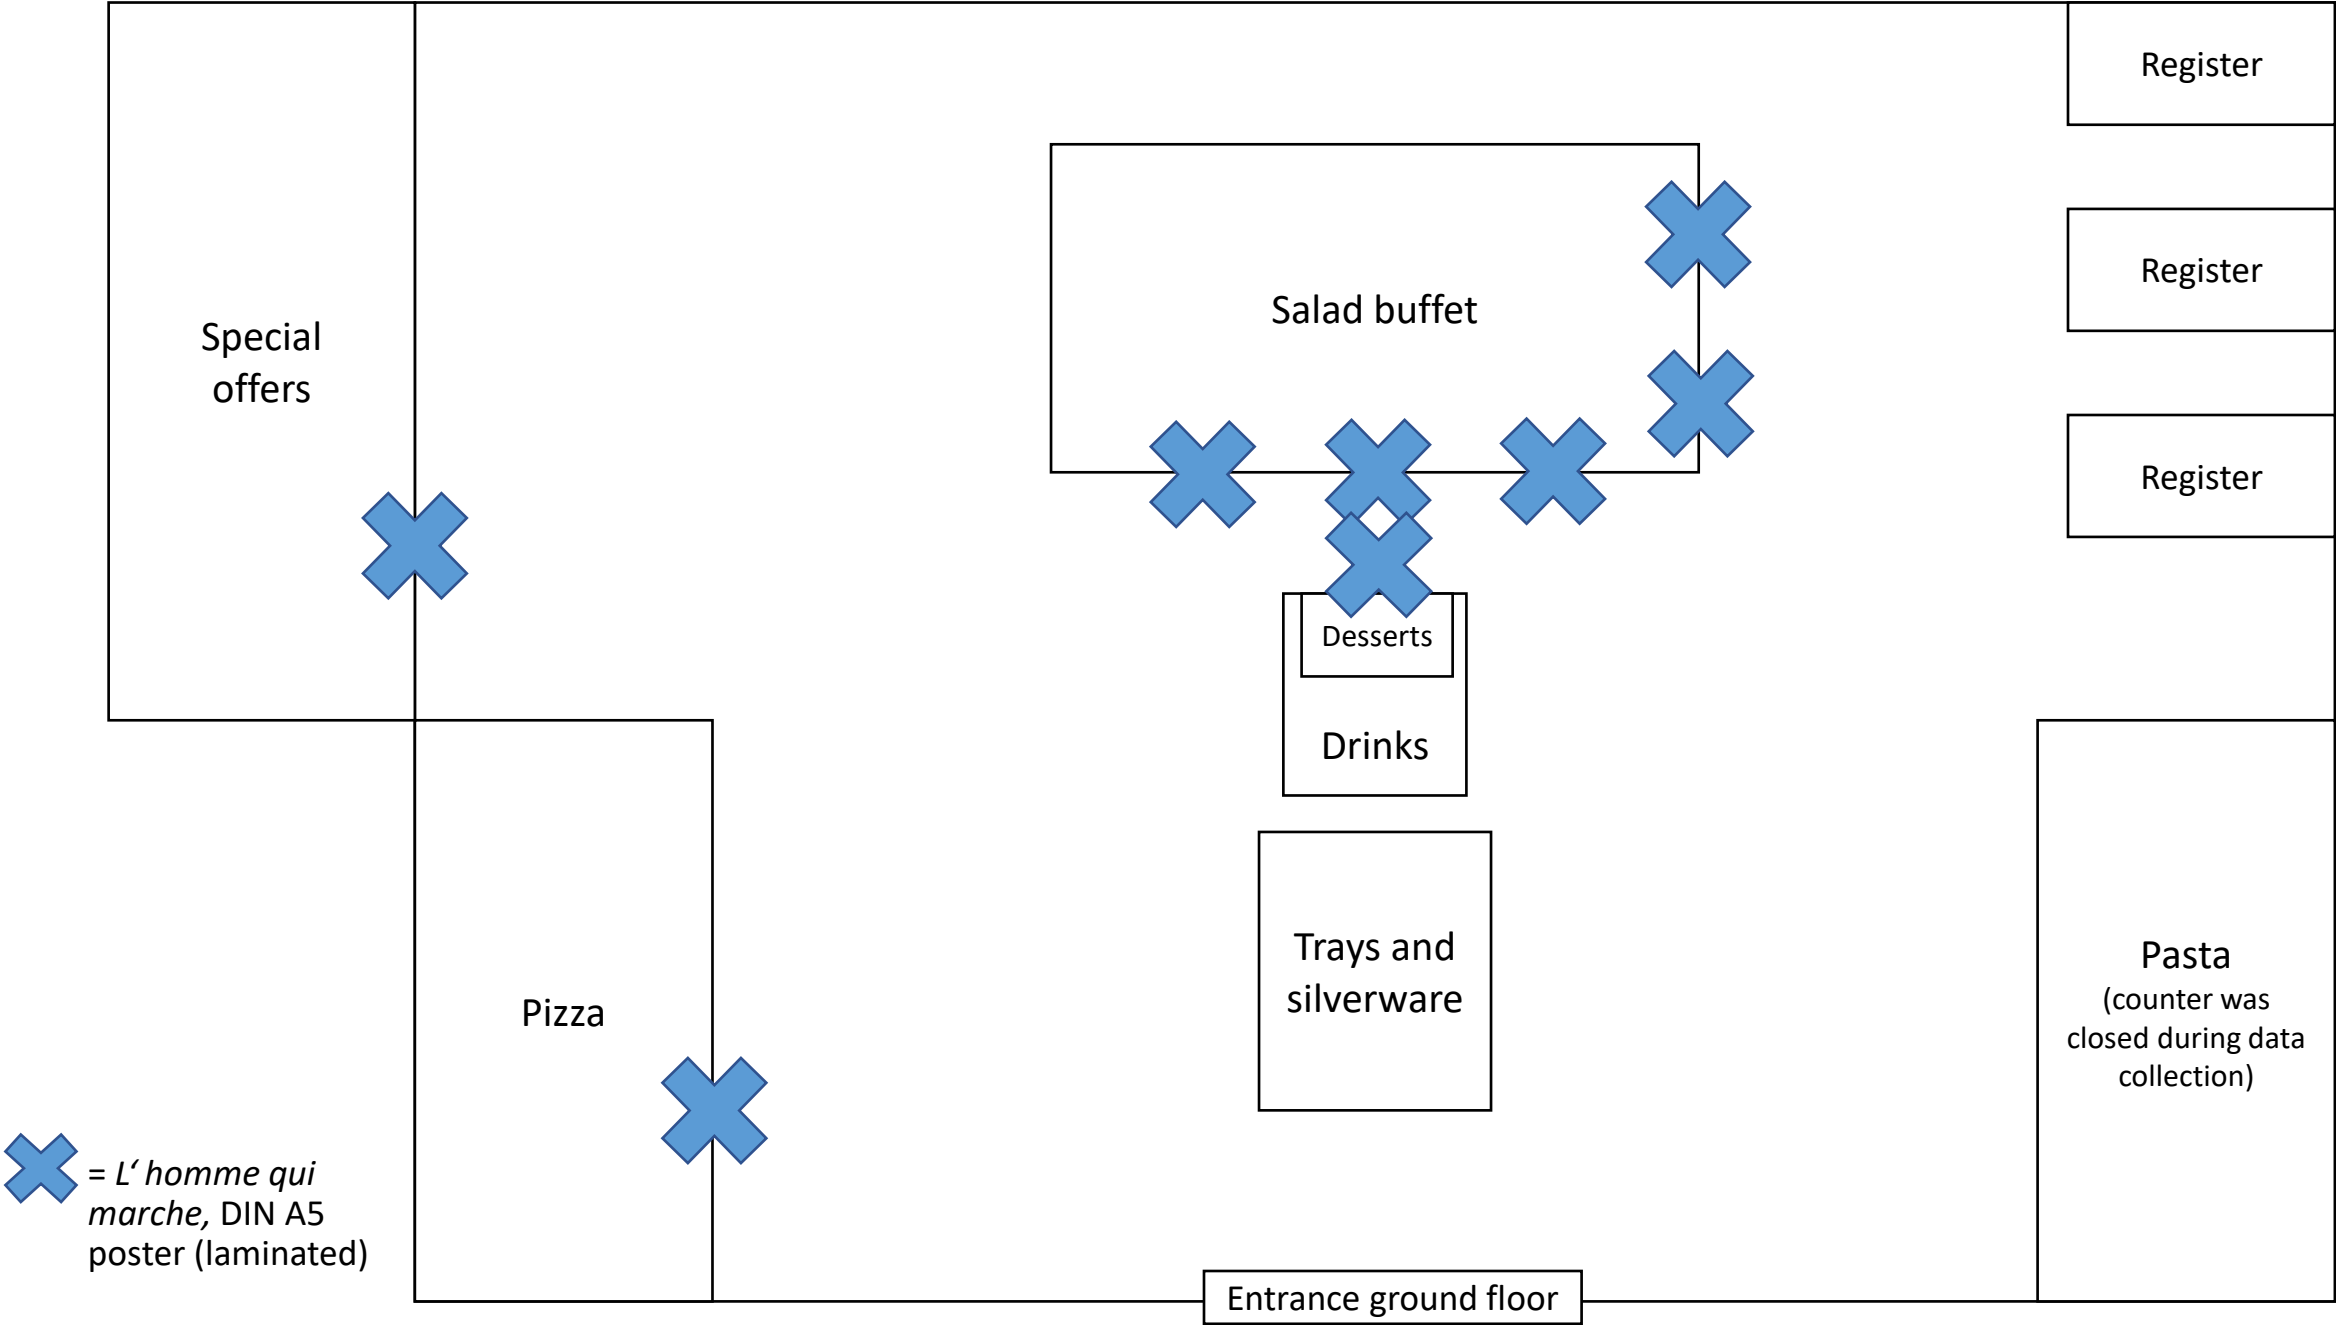

Supplement: s1 [file s1]
