# Supplementary material for: Effects of a Nudging Cue Targeting Food Choice in a University Cafeteria: A Field Study
Source: MDPI journal article supplement (doi:10.3390/healthcare11091307), 2023-05-03
Supplement: s1 [file s1]

Liebe/r Teilnehmende/r,

diese Umfrage findet als Kooperation der Universität Maastricht, der Hochschule Bonn-Rhein-Sieg und der Mensa Campo statt. Sie ist Teil meiner Doktorarbeit zu den Effekten von Maßnahmen im Bereich Ernährung. Die Fragen behandeln z. B. die Gründe zur Menüwahl und die Akzeptanz von verschiedenen Maßnahmen zur Förderung von gesunder Ernährung.

Bei Fragen kannst du dich an Christine Kawa wenden:

Christine Kawa, M. Sc.

Hochschule Bonn-Rhein-Sieg

Von-Liebig-Str. 20

53359 Rheinbach

E-Mail: [christine.kawa@h-brs.de](mailto:christine.kawa@h-brs.de)

## INFORMIERTE TEILNAHME UND DATENSCHUTZ

### Unversehrtheit und Rechte der Teilnehmer

Durch die Teilnahme an dieser Studie entstehen keine seelischen oder körperliche Schäden. Deine Teilnahme ist freiwillig. Du hast jederzeit die Möglichkeit zu widerrufen. Durch Verweigerung oder Widerruf entstehen keine Nachteile. Ethische Begutachtung erfolgte durch das Ethics Review Committee Psychology and Neuroscience (ERCPN) der Maastricht University, Niederlande (Code ERCIC\_368\_26\_06\_2022).

### Datenschutz

Die Daten werden ohne Rückschlüsse auf deine Person erhoben und ausgewertet (vollständig anonymisiert). Auf die anonymisierten Daten hat während und nach der Befragung nur Christine Kawa vollständigen Zugriff. Alle Angaben werden unter strenger Einhaltung der Datenschutzbestimmungen behandelt. Die Ergebnisse werden so veröffentlicht, dass eine Identifikation einzelner Personen nicht möglich ist. Die Daten werden nur so lange gespeichert, wie sie für die Durchführung der Studie benötigt werden (max. 2 Jahre). Bei Fragen wende dich gern per E-Mail an den Datenschutzbeauftragten der Hochschule Bonn-Rhein-Sieg: [datenschutzbeauftragte@h-brs.de](mailto:datenschutzbeauftragte@h-brs.de)

Du hast als betroffene Person das Recht auf Berichtigung unrichtiger oder unvollständiger Daten (Artikel 16 DSGVO). Zur Ausübung dieser Rechte kannst du dich jederzeit an Christine Kawa (Hochschule Bonn-Rhein-Sieg) wenden.

Es besteht das Recht zur Beschwerde bei der für die Hochschule Bonn-Rhein-Sieg zuständigen Aufsichtsbehörde:

Landesbeauftragte für Datenschutz und Informationsfreiheit Nordrhein-Westfalen

Kavalleriestr. 2-4, 40213 Düsseldorf, Tel.: 0211/38424-0, E-Mail: [poststelle@ldi.nrw.de](mailto:poststelle@ldi.nrw.de)

**Ich habe die Informationen zur Studie und zur Verwendung meiner Daten gelesen. Ich hatte die Möglichkeit Fragen zu stellen und über meine Teilnahme nachzudenken. Ich bin 16 Jahre oder älter und stimme zu, an dieser Studie teilzunehmen.**

**Dies bestätige ich durch Ankreuzen:**

☐

Menüwahl: VX# \_\_\_\_\_

Datum: \_\_\_\_\_ 10.2022

Uhrzeit: \_\_\_\_\_

1. Hauptgericht: \_\_\_\_\_
2. Beilagen: \_\_\_\_\_
3. Dessert: \_\_\_\_\_

4. Bitte nenne die Gründe für deine Wahl. (Mehrfachauswahl möglich)

- |                                                                    |                                                                                |
|--------------------------------------------------------------------|--------------------------------------------------------------------------------|
| <input type="radio"/> Geschmack                                    | <input type="radio"/> Gemeinschaft (weil es gesellig ist)                      |
| <input type="radio"/> Gewohnheit                                   | <input type="radio"/> Preis                                                    |
| <input type="radio"/> Hunger                                       | <input type="radio"/> Präsentation (weil es mich anspricht)                    |
| <input type="radio"/> Gesundheit (weil es gesund ist)              | <input type="radio"/> Gewichtskontrolle                                        |
| <input type="radio"/> Einfachheit (weil es wenig Aufwand bedeutet) | <input type="radio"/> Gefühlsregulierung (um negative Gefühle zu kompensieren) |
| <input type="radio"/> Genuss (weil ich mir etwas gönnen wollte)    | <input type="radio"/> Soziale Normen (weil es von mir erwartet wird)           |
| <input type="radio"/> Tradition (weil ich damit aufgewachsen bin)  | <input type="radio"/> Soziales Image (weil es „in“ ist)                        |
| <input type="radio"/> Natürlichkeit (weil es naturbelassen ist)    |                                                                                |

5. Wie hungrig warst du, als du dein Essen gewählt hast?

- ☐ gar nicht hungrig   ☐ kaum hungrig   ☐ teils/ teils   ☐ etwas hungrig   ☐ sehr hungrig

Im Folgenden stellen wir dir eine Aussage zum Thema Akzeptanz von Maßnahmen im Bereich der Ernährung vor. Bitte gib an, inwiefern du diesen Aussagen zustimmst.

6. Ich denke, es wäre akzeptabel, wenn die Mensa die folgenden Maßnahmen anwenden würde, um gesunde Ernährung zu bewerben:

|                                                                                | stimme<br>nicht zu    | stimme<br>eher<br>nicht zu | teils/ teils          | stimme<br>eher zu     | stimme<br>zu          |
|--------------------------------------------------------------------------------|-----------------------|----------------------------|-----------------------|-----------------------|-----------------------|
| Berühmte Personen als Informationsquelle                                       | <input type="radio"/> | <input type="radio"/>      | <input type="radio"/> | <input type="radio"/> | <input type="radio"/> |
| Wettbewerb zum größten Gemüseverzehr                                           | <input type="radio"/> | <input type="radio"/>      | <input type="radio"/> | <input type="radio"/> | <input type="radio"/> |
| Kampagnen mit abschreckenden Botschaften                                       | <input type="radio"/> | <input type="radio"/>      | <input type="radio"/> | <input type="radio"/> | <input type="radio"/> |
| Informationen zum Gemüsekonsum Kommilitonen                                    | <input type="radio"/> | <input type="radio"/>      | <input type="radio"/> | <input type="radio"/> | <input type="radio"/> |
| Grüner Salat als automatische Beilage (die auch abgewählt werden kann)         | <input type="radio"/> | <input type="radio"/>      | <input type="radio"/> | <input type="radio"/> | <input type="radio"/> |
| Poster mit Tipps für einen höheren Gemüsekonsum                                | <input type="radio"/> | <input type="radio"/>      | <input type="radio"/> | <input type="radio"/> | <input type="radio"/> |
| Ansprache durch Mensa-Mitarbeiter, die nach zusätzlicher Gemüse-Auswahl fragen | <input type="radio"/> | <input type="radio"/>      | <input type="radio"/> | <input type="radio"/> | <input type="radio"/> |
| Ansprechendere Bezeichnung von Gerichten mit viel Gemüse                       | <input type="radio"/> | <input type="radio"/>      | <input type="radio"/> | <input type="radio"/> | <input type="radio"/> |
| Poster, auf denen sehr dünne künstlerische Skulpturen zu sehen sind            | <input type="radio"/> | <input type="radio"/>      | <input type="radio"/> | <input type="radio"/> | <input type="radio"/> |

7. Wie sehr hast du das Poster heute in der Mensa bewusst wahrgenommen?

- ☐ gar nicht   ☐ kaum   ☐ teils/ teils   ☐ etwas   ☐ sehr

Angaben zu deiner Person: Diese dienen nur dazu, die Stichprobe dieser Umfrage beschreiben zu können. Wenn du eine Frage nicht beantworten möchtest, überspringe diese Frage.

8. Zutreffendes bitte ankreuzen:   ☐ Ich sitze in einer Gruppe am Tisch   ☐ Ich sitze allein am Tisch

9. Alter: \_\_\_\_\_ Jahre

10. Körpergröße: \_\_\_\_\_ cm (z.B. 163cm)

11. Körpergewicht: \_\_\_\_\_ kg

12. Geschlecht:   ☐ Männlich   ☐ Weiblich   ☐ Divers

13. Status:   ☐ Studierender   ☐ Unimitarbeiter   ☐ Hochschulextern

14. Wie viele Male hast du diese Woche schon in dieser Mensa gegessen:

- ☐ 1   ☐ 2   ☐ 3   ☐ 4   ☐ 5

HERZLICHEN DANK für deine Teilnahme an dieser Umfrage!
